# Supplementary material for: Artificial intelligence-based prediction of transfusion in the intensive care unit in patients with gastrointestinal bleeding
Source: HighWire-hosted journal article supplement (doi:10.1136/bmjhci-2020-100245), 2021-01-01
Supplement: bmjhci-2020-100245supp007_data_supplement.pdf [file bmjhci-2020-100245supp007_data_supplement.pdf]

Table A2 – Comparison table of several classifiers trained on the MIMIC-III training set.

| Models                | Accuracy    |              | ROC AUC      |              | Sensitivity  |              | Specificity  |              |
|-----------------------|-------------|--------------|--------------|--------------|--------------|--------------|--------------|--------------|
|                       | MIMIC       | eICU-CRD     | MIMIC        | eICU-CRD     | MIMIC        | eICU-CRD     | MIMIC        | eICU-CRD     |
| <b>SVM</b>            | 68.67       | 64.34        | 68.47        | 68.60        | 63.01        | 77.58        | 69.13        | 40.68        |
| <b>LR</b>             | 73.96       | <b>66.63</b> | 73.80        | 71.24        | 69.75        | 80.97        | <b>74.49</b> | <b>42.89</b> |
| <b>RF</b>             | 74.33       | 61.20        | 74.44        | 69.88        | 77.46        | 88.20        | 71.53        | 39.39        |
| <b>MLP</b>            | 64.04       | 62.75        | 63.94        | 63.15        | 61.27        | 64.01        | 62.97        | 37.74        |
| <b>Ensemble model</b> | <b>74.7</b> | 50.21        | <b>81.41</b> | <b>76.34</b> | <b>85.36</b> | <b>92.77</b> | 64.82        | 35.02        |

\* The ensemble model is the final voting classifier that combines LR and RF.
