# Supplementary material for: Artificial intelligence-based prediction of transfusion in the intensive care unit in patients with gastrointestinal bleeding
Source: HighWire-hosted journal article supplement (doi:10.1136/bmjhci-2020-100245), 2021-01-01
Supplement: bmjhci-2020-100245supp008_data_supplement.pdf [file bmjhci-2020-100245supp008_data_supplement.pdf]

Table A3 – Comparison table of several classifiers trained on the eICU-CRD training set.

| Models                | Accuracy     |              | ROC AUC      |              | Sensitivity  |              | Specificity  |              |
|-----------------------|--------------|--------------|--------------|--------------|--------------|--------------|--------------|--------------|
|                       | MIMIC        | eICU-CRD     | MIMIC        | eICU-CRD     | MIMIC        | eICU-CRD     | MIMIC        | eICU-CRD     |
| <b>SVM</b>            | 52.36        | 73.96        | 50.81        | 53.5         | 10.02        | 10.32        | 52.53        | 52.63        |
| <b>LR</b>             | 63.21        | 76.79        | 62.06        | 63.06        | 31.98        | 34.07        | 79.05        | 60.47        |
| <b>RF</b>             | 64.50        | <b>77.84</b> | 63.37        | 64.43        | 33.53        | 36.14        | <b>82.08</b> | 63.97        |
| <b>MLP</b>            | 65.52        | 75.05        | 64.95        | 66.24        | 49.90        | 47.64        | 69.81        | 52.86        |
| <b>Ensemble model</b> | <b>74.88</b> | 68.84        | <b>80.17</b> | <b>79.08</b> | <b>69.17</b> | <b>75.81</b> | 79.82        | <b>68.72</b> |

\* The ensemble model is the final voting classifier that combines LR and RF.
