# Supplementary material for: Artificial intelligence-based prediction of transfusion in the intensive care unit in patients with gastrointestinal bleeding
Source: HighWire-hosted journal article supplement (doi:10.1136/bmjhci-2020-100245), 2021-01-01
Supplement: bmjhci-2020-100245supp009_data_supplement.pdf [file bmjhci-2020-100245supp009_data_supplement.pdf]

Table A4 – Comparison table for several classifiers trained on both MIMIC-III and the eICU-CRD training set.

| Models                 | Accuracy     |              | ROC AUC      |              | Sensitivity  |              | Specificity  |              |
|------------------------|--------------|--------------|--------------|--------------|--------------|--------------|--------------|--------------|
|                        | MIMIC        | eICU-CRD     | MIMIC        | eICU-CRD     | MIMIC        | eICU-CRD     | MIMIC        | eICU-CRD     |
| <b>SVM</b>             | 66.36        | 74.27        | 66.03        | 64.86        | 57.42        | 44.99        | 67.73        | 51.26        |
| <b>LR</b>              | 68.86        | 76.41        | 68.22        | 64.88        | 51.45        | 40.56        | <b>76.07</b> | 57.29        |
| <b>RF</b>              | 74.79        | <b>77.76</b> | 74.73        | 66.09        | 73.22        | 41.45        | 74.07        | 61.49        |
| <b>MLP</b>             | 72.10        | 75.05        | 72.01        | 65.38        | 69.56        | 44.99        | 71.63        | 53.04        |
| <b>Ensemble model*</b> | <b>74.88</b> | 68.84        | <b>80.35</b> | <b>79.08</b> | <b>78.61</b> | <b>78.61</b> | 71.43        | <b>65.35</b> |

\* The ensemble model is the final voting classifier that combines LR and RF.
